# Supplementary material for: Preparation and characterization of Antarctic krill oil/quercetin co-loaded liposomes and their protective effect on oleic acid-induced steatosis and oxidative stress in vitro
Source: Royal Society of Chemistry journal article supplement (doi:10.1039/d3fo04291j), 2024-01-01
Supplement: d3fo04291j1.pdf [file d3fo04291j1.pdf]

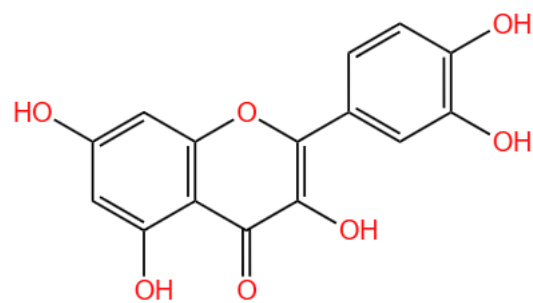

**Quercetin**

**Fig.1** Chemical structure of quercetin

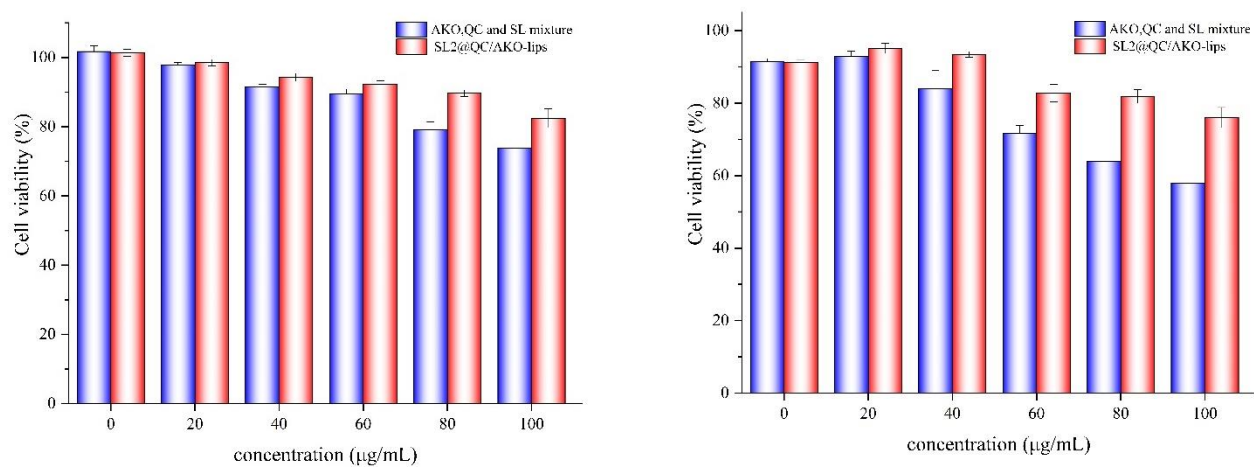

**Fig.2** Effect of SL2@QC/AKO-lips on cell viability in HepG2 cells. Cell viability in un-treated with OA-BSA (a), Cell viability in treated with OA-BSA (b).

**Table S1.** Lipid class composition of AKO

| class                               | abbreviation | AKO content (%) | class                          | abbreviation | AKO content (%) |
|-------------------------------------|--------------|-----------------|--------------------------------|--------------|-----------------|
| Acyl Carnitine                      | AcCa         | 0.056           | Zymosterol ester               | ZyE          | 0.082           |
| Acyl Hexosyl Sitolsterolester       | AcHexSiE     | 0.001           | Lysophosphatidylethanol        | LPET         | 0.016           |
| Ceramide                            | Cer          | 0.319           | Lysophosphatidylglycerol       | LPG          | 0.001           |
| Dihexosyl N-acetylhexosyl ceramide  | CerG2GNAc1   | 0.003           | Monoglyceride                  | MG           | 0.079           |
| Trihexosyl N-acetylhexosyl ceramide | CerG3GNAc1   | 0.002           | O-Acyl-(gamma-hydroxy) FA      | OAHFA        | 0.007           |
| Ceramide phosphate                  | CerP         | 0.042           | Phosphatidic acid              | PA           | 0.011           |
| Cholesterol ester                   | ChE          | 0.06            | Phosphatidylcholine            | PC           | 37.692          |
| Campesterol ester                   | CmE          | 0.002           | Phosphatidylethanolamine       | PE           | 1.243           |
| Coenzyme Q                          | Co           | 0.003           | Phosphatidylglycerol           | PG           | 0.001           |
| Cyclicphosphatidic acid             | cPA          | 0.012           | Phosphatidylinositol           | PI           | 0.004           |
| Diglyceride                         | DG           | 4.895           | Phosphatidylmethanol           | PMe          | 0.001           |
| Fatty acid                          | FA           | 10.449          | Sphingomyelin                  | SM           | 0.041           |
| Hexosyl ceramide                    | Hex1Cer      | 0.937           | Sphingosinebases               | SPH          | 0.003           |
| Dihexosyl ceramide                  | Hex2Cer      | 0.013           | Sphingosine phosphate          | SPHP         | 0.396           |
| Lysophosphatidic acid               | LPA          | 0.015           | Stigmasterolester              | StE          | 0.001           |
| Lysophosphatidylcholine             | LPC          | 14.053          | Triglyceride                   | TG           | 28.958          |
| Lysophosphatidylethanolamine        | LPE          | 0.538           | Wax esters (fatty acid esters) | WE           | 0.062           |

**Table S2.** Fatty Acids Composition of AKO

| FAs        | AKO content (%) | FAs         | AKO content (%) |
|------------|-----------------|-------------|-----------------|
| C12:0      | 0.063±0.005     | C20:2, n6c  | 0.208±0.004     |
| C14:0      | 5.155±0.006     | C20:1, n9c  | 3.470±0.003     |
| C15:0      | 0.205±0.003     | C20:3, n3c  | 0.079±0.002     |
| C16:0      | 15.501±0.003    | C20:1, n7c  | 2.328±0.025     |
| C16:3, n1c | 0.608±0.001     | C20:0       | 0.109±0.001     |
| C16:4, n4c | 0.367±0.012     | C21:5, n3c  | 0.902±0.005     |
| C16:1      | 0.878±0.001     | C21:0       | 0.028±0.001     |
| C17:1, n7c | 0.292±0.002     | C22:6, n3c  | 23.821±0.028    |
| C17:0      | 0.284±0.002     | C22:5, n3c  | 1.802±0.015     |
| C18:3, n6c | 0.152±0.001     | C22:1, n9c  | 0.611±0.003     |
| C18:4, n3c | 2.921±0.001     | C22:1, n11c | 0.253±0.004     |
| C18:2, n6c | 1.634±0.006     | C23:0       | 0.013±0.001     |
| C18:1, n9c | 7.390±0.004     | C24:1, n9c  | 0.178±0.009     |
| C18:0      | 1.364±0.0012    | SFA         | 22.723±0.017    |
| C20:4, n6c | 0.711±0.015     | MUFA        | 15.400±0.009    |
| C20:5, n3c | 27.516±0.092    | PUFA        | 61.807±0.106    |
| C20:3, n6c | 0.348±0.009     | ω-3 PUFA    | 57.843±0.002    |
| C20:4, n3c | 0.801±0.009     | ω-6 PUFA    | 3.053±0.002     |
